# Supplementary material for: Transcriptomic and Proteomic Responses of Sweetpotato Whitefly, Bemisia tabaci, to Thiamethoxam
Source: PLoS One. 2013 May 9;8(5):e61820. doi: 10.1371/journal.pone.0061820 (PMC3650016; doi:10.1371/journal.pone.0061820)
Supplement: Table S2 — Differentially expressed genes within drug metabolism pathway in response to thiamethoxam exposure. (XLSX) [file pone.0061820.s003.xlsx]

## Sheet: Sheet1
Table S2: Differentially expressed genes within drug metabolism pathway in response to thiamethoxam exposure. Up-regulated transcripts by 2-fold are in red, while down-regulated transcripts by 2-fold are in green.
E C no.	Gene ID	KO ID	FC*	Accession no.	Homologous function**
CYP3A4	2.0_insect_isotig04644	K07424	2.5	XP_001944599.1	PREDICTED: similar to cytochrome P450 CYP6AY1 protein [Acyrthosiphon pisum]
CYP3A4	2.0_insect_isotig02841	K07424	1.3	ACT78507.2	cytochrome P450 CYP6CX1v2 [Bemisia tabaci]
CYP3A4	SCAFFOLD26091	K07424	-1.7	XP_001945100.1	PREDICTED: similar to cytochrome P450 [Acyrthosiphon pisum]
CYP3A4	2.0_insect_isotig05513	K07424	-1.1	AAK32957.1	cytochrome P450 [Anopheles gambiae]
2.5.1.18	2.0_insect_GH93ESX01BBYEK	K00799	1.6	ACH90395.1	glutathione-S-transferase [Bemisia tabaci]
2.5.1.18	2.0_insect_isotig02497	K00799	1.6	ACH90394.1	glutathione-S-transferase [Bemisia tabaci]
2.5.1.18	SCAFFOLD30058	K00799	1.5	ACH90395.1	glutathione-S-transferase [Bemisia tabaci]
2.5.1.18	2.0_insect_isotig00408	K00799	1.2	ACH90394.1	glutathione-S-transferase [Bemisia tabaci]
2.5.1.18	2.0_insect_isotig02573	K00799	-1.2	ABQ53631.1	glutathione S-transferase 3 [Choristoneura fumiferana]
2.4.1.17	SCAFFOLD30690	K00699	2.1	XP_969004.1	PREDICTED: similar to antennal-enriched UDP-glycosyltransferase [Tribolium castaneum]
2.4.1.17	2.0_insect_GH93ESX03GA5G4	K00699	1.8	XP_002704642.1	PREDICTED: UDP glucuronosyltransferase 2B10 [Bos taurus]
2.4.1.17	SCAFFOLD18671	K00699	1.6	XP_969321.2	PREDICTED: similar to glucosyl/glucuronosyl transferases [Tribolium castaneum]
2.4.1.17	2.0_insect_isotig02032	K00699	1.5	XP_001952770.1	PREDICTED: similar to AGAP007029-PA [Acyrthosiphon pisum]
2.4.1.17	BT_Q_ZJU_Singletons16804	K00699	1.4	XP_967606.2	PREDICTED: similar to glucosyl/glucuronosyl transferases [Tribolium castaneum]
2.4.1.17	2.0_insect_isotig02612	K00699	1.4	EFA02977.1	hypothetical protein TcasGA2_TC030780 [Tribolium castaneum]
2.4.1.17	2.0_others_isotig06556	K00699	1.3	NP_001135960.1	uridine diphosphate glucosyltransferase [Bombyx mori]
2.4.1.17	2.0_insect_isotig01866	K00699	1.3	XP_556403.3	AGAP005752-PA [Anopheles gambiae str. PEST]
2.4.1.17	SCAFFOLD33197	K00699	1.3	EFA09910.1	hypothetical protein TcasGA2_TC012061 [Tribolium castaneum]
2.4.1.17	2.0_insect_isotig01873	K00699	1.1	XP_967924.1	PREDICTED: similar to glucosyl/glucuronosyl transferases [Tribolium castaneum]
2.4.1.17	2.0_insect_isotig00866	K00699	-2	XP_001360426.2	GA13878 [Drosophila pseudoobscura pseudoobscura]
1.14.13.8	2.0_insect_isotig00683	K00485	1.3	XP_001946449.1	PREDICTED: similar to AGAP010399-PA [Acyrthosiphon pisum]
*FC, fold change (log2 ratio) of gene expression
**Homologous function, the function of the homologous gene
