# Supplementary material for: Transcriptomic and Proteomic Responses of Sweetpotato Whitefly, Bemisia tabaci, to Thiamethoxam
Source: PLoS One. 2013 May 9;8(5):e61820. doi: 10.1371/journal.pone.0061820 (PMC3650016; doi:10.1371/journal.pone.0061820)
Supplement: Table S3 — Differentially expressed genes within metabolism pathways in response to thiamethoxam exposure. (XLSX) [file pone.0061820.s004.xlsx]

## Sheet: Sheet1
Table S3: Differentially expressed genes within metabolism pathways in response to thiamethoxam exposure.Up-regulated transcripts by 2-fold are in red, while down-regulated transcripts by 2-fold are in green.
Gene ID	FC	Accession no.	Homologous function
2.0_insect_GG3J73P03F1ZDH	4.1	XP_002943840.1	predicted: ubiquinol oxidase subunit 1-like, partial [xenopus (silurana) tropicalis]
2.0_others_GG3J73P03HDFOS	3.7
2.0_insect_GH93ESX01B4IEJ	3.3	XP_001945190.1	predicted: similar to cg3523 cg3523-pa [acyrthosiphon pisum]
SCAFFOLD12300	2.9	XP_321436.4	agap001657-pa [anopheles gambiae str. pest]
2.0_insect_isotig04644	2.5	XP_001944599.1	predicted: similar to cytochrome p450 cyp6ay1 protein [acyrthosiphon pisum]
BT_Q_ZJU_Singletons3214	2.3	Q27902.1|CP6B4_PAPGL	predicted: similar to cg9149-pa [nasonia vitripennis]
SCAFFOLD30690	2.1	XP_969004.1	predicted: similar to antennal-enriched udp-glycosyltransferase [tribolium castaneum]
2.0_others_isotig00816	2	XP_967645.1	predicted: similar to ga14517-pa [tribolium castaneum]
2.0_insect_GH93ESX03GA5G4	1.8	XP_002704642.1	predicted: udp glucuronosyltransferase 2b10 [bos taurus]
2.0_insect_isotig01901	1.7	XP_001951112.1	predicted: similar to alpha-amylase [acyrthosiphon pisum]
BT_Q_ZJU_Singletons10364	1.6	XP_001948459.1	alpha amylase [bombyx mori]
SCAFFOLD15995	1.6	XP_001951112.1	predicted: similar to alpha-amylase [acyrthosiphon pisum]
2.0_insect_GH93ESX01BBYEK	1.6	ACH90395.1	glutathione-s-transferase [bemisia tabaci]
SCAFFOLD18671	1.6	XP_969321.2	predicted: similar to glucosyl/glucuronosyl transferases [tribolium castaneum]
2.0_insect_isotig02497	1.6	ACH90394.1	glutathione-s-transferase [bemisia tabaci]
C3282452	1.6	XP_623502.2	predicted: similar to lethal (1) g0334 cg7010-pc, isoform c isoform 1 [apis mellifera]
SCAFFOLD30058	1.5	ACH90395.1	glutathione-s-transferase [bemisia tabaci]
2.0_insect_isotig01581	1.5	NP_001129567.1	stunted-like isoform b [acyrthosiphon pisum]
2.0_others_isotig03354	1.5	YP_086806.1	nadh dehydrogenase subunit 5 [bemisia tabaci]
SCAFFOLD17597	1.5	XP_001951112.1	predicted: similar to alpha-amylase [acyrthosiphon pisum]
2.0_insect_isotig02032	1.5	XP_001952770.1	predicted: similar to agap007029-pa [acyrthosiphon pisum]
2.0_insect_isotig03342	1.5	XP_001943317.1	predicted: similar to ga13362-pa [acyrthosiphon pisum]
BT_Q_ZJU_Singletons16804	1.4	XP_967606.2	predicted: similar to glucosyl/glucuronosyl transferases [tribolium castaneum]
2.0_insect_isotig02612	1.4	EFA02977.1	hypothetical protein tcasga2_tc030780 [tribolium castaneum]
2.0_insect_GH93ESX03FWFTC	1.4	EFA11419.1	hypothetical protein tcasga2_tc013596 [tribolium castaneum]
2.0_insect_isotig02066	1.4	XP_623502.2	predicted: similar to lethal (1) g0334 cg7010-pc, isoform c isoform 1 [apis mellifera]
2.0_insect_isotig02741	1.4	XP_001949659.1	predicted: similar to sucrase, partial [acyrthosiphon pisum]
2.0_others_isotig06556	1.3	NP_001135960.1	uridine diphosphate glucosyltransferase [bombyx mori]
2.0_others_isotig14484	1.3	NP_001103784.1	nadh dehydrogenase isoform 2 [bombyx mori]
2.0_insect_isotig01866	1.3	XP_556403.3	agap005752-pa [anopheles gambiae str. pest]
2.0_others_isotig07228	1.3	XP_973533.1	predicted: similar to malate dehydrogenase [tribolium castaneum]
SCAFFOLD33197	1.3	EFA09910.1	hypothetical protein tcasga2_tc012061 [tribolium castaneum]
2.0_others_isotig08093	1.3	AAV91354.1	atp synthase 2 [lonomia obliqua]
2.0_insect_GH93ESX01B214F	1.3	XP_970461.1	predicted: similar to cg3961 cg3961-pa [tribolium castaneum]
2.0_insect_isotig02841	1.3	ACT78507.2	cytochrome p450 cyp6cx1v2 [bemisia tabaci]
2.0_insect_isotig01915	1.2	XP_001607032.1	predicted: similar to cg9149-pa [nasonia vitripennis]
BT_Q_ZJU_Singletons8012	1.2	XP_001951112.1	predicted: similar to alpha-amylase [acyrthosiphon pisum]
2.0_insect_isotig01052	1.2	AAS77767.1	nadh dehydrogenase subunit 1 [bemisia argentifolii]
SCAFFOLD42845	1.1	XP_395996.1	predicted: similar to cg3961-pa, isoform a [apis mellifera]
2.0_others_isotig11986	1.1
2.0_insect_isotig00774	1.1	NP_001164444.1	peroxiredoxin-like protein [apis mellifera]
2.0_others_isotig07193	1.1	XP_002433179.1	arginine kinase, putative [pediculus humanus corporis]
2.0_insect_isotig01208	1.1	YP_086806.1	nadh dehydrogenase subunit 5 [bemisia tabaci]
SCAFFOLD37344	1.2	XP_002159652.1	predicted: similar to 5,10-methylenetetrahydrofolate reductase [hydra magnipapillata]
2.0_insect_isotig00408	1.2	ACH90394.1	glutathione-s-transferase [bemisia tabaci]
2.0_insect_isotig01458	1.1	XP_001951495.1	predicted: similar to cg3321 cg3321-pa [acyrthosiphon pisum]
2.0_insect_isotig01873	1.1	XP_967924.1	predicted: similar to glucosyl/glucuronosyl transferases [tribolium castaneum]
2.0_others_isotig01079	1.1	XP_001955812.1	gf16047 [drosophila ananassae]
2.0_others_isotig07273	1.1	XP_002612524.1	hypothetical protein brafldraft_214346 [branchiostoma floridae]
C3496561	1.1	XP_001952392.1	predicted: similar to pyrroline-5-carboxylate dehydrogenase [acyrthosiphon pisum]
2.0_insect_isotig00710	1	ADD20406.1	cytochrome c oxidase subunit vib cox12 [glossina morsitans morsitans]
2.0_others_isotig05958	1
SCAFFOLD7137	1	NP_001135804.1	ctp synthase [nasonia vitripennis]
C3375150	-3.5	XP_001952191.1	predicted: similar to aconitase [acyrthosiphon pisum]
BT_Q_ZJU_Singletons35563	-4.3	EFA01751.1	hypothetical protein tcasga2_tc007349 [tribolium castaneum]
C3442656	-4.3	Q9PWF7.3|CATA_RANRU	recname: full=catalase
C3483499	-13	XP_392684.2	predicted: similar to dihydropteridine reductase cg4665-pa, isoform a [apis mellifera]
C3421652	-13.3	XP_001844183.1	pyruvate carboxylase, mitochondrial [culex quinquefasciatus]
2.0_insect_GH93ESX03F1W38	-13.6	XP_321892.3	agap001257-pa [anopheles gambiae str. pest]
BT_Q_ZJU_Singletons14795	-14	XP_001122822.1	predicted: similar to 1-acyl-sn-glycerol-3-phosphate acyltransferase [acyrthosiphon pisum]
2.0_insect_isotig06379	-14.2	XP_001603835.1	predicted: similar to 1-acyl-sn-glycerol-3-phosphate acyltransferase [nasonia vitripennis]
SCAFFOLD9093	-3.4	NP_001119607.1	sucrase [acyrthosiphon pisum]
BT_Q_ZJU_Singletons12240	-2.6	XP_001944621.1	adenosine deaminase, putative [pediculus humanus corporis]
2.0_others_isotig05856	-2.5	XP_970133.1	predicted: similar to rpb8 cg11246-pa [tribolium castaneum]
gi|113018895|gb|EE600549.1|EE600549	-2.5	AAY66829.1	succinate dehydrogenase ip subunit [ixodes scapularis]
2.0_insect_isotig02813	-2.4	XP_001604902.1	predicted: similar to purine nucleoside phosphorylase [nasonia vitripennis]
C3405582	-2.2	XP_001649786.1	hypothetical protein aael_aael000647 [aedes aegypti]
2.0_insect_isotig02681	-2.2	XP_001947706.1	predicted: similar to putative pyridoxamine 5-phosphate oxidase, partial [acyrthosiphon pisum]
C3319448	-1.8	XP_001945190.1	predicted: similar to cg3523 cg3523-pa [acyrthosiphon pisum]
BT_Q_ZJU_Singletons18698	-1.9	XP_001946842.1	predicted: similar to agap000211-pa [acyrthosiphon pisum]
C3426116	-1.9	XP_001943317.1	predicted: similar to ga13362-pa [acyrthosiphon pisum]
SCAFFOLD13613	-1.9	CAA35587.1	unnamed protein product [drosophila melanogaster]
2.0_insect_isotig00866	-2	XP_001360426.2	ga13878 [drosophila pseudoobscura pseudoobscura]
C3284456	-2	XP_001945190.1	predicted: similar to cg3523 cg3523-pa [acyrthosiphon pisum]
SCAFFOLD19372	-2	XP_001947773.1	predicted: similar to pancreatic lipase related protein 1 [acyrthosiphon pisum]
2.0_insect_isotig05483	-2.1	1E3J	chain a, ketose reductase (sorbitol dehydrogenase) from silverleaf whitefly
2.0_insect_GG3J73P03GQFKF	-1.8	CAR85697.1	hemocyanin subunit type 1 precursor [cryptotermes secundus]
BT_Q_ZJU_Singletons20651	-1.8	XP_002052293.1	maltase 1 [drosophila virilis]
BT_Q_ZJU_Singletons14688	-1.8	XP_001607279.1	predicted: similar to uricase [nasonia vitripennis]
2.0_insect_isotig01983	-1.8	XP_002052293.1	maltase 1 [drosophila virilis]
2.0_insect_isotig01930	-1.8	Q9PWF7.3|CATA_RANRU	recname: full=catalase
2.0_others_isotig16124	-1.7
BT_Q_ZJU_Singletons22877	-1.5	XP_001943317.1	predicted: similar to ga13362-pa [acyrthosiphon pisum]
C3278111	-1.5	NP_001153852.1	atp citrate lyase [acyrthosiphon pisum]
2.0_insect_isotig03633	-1.5	XP_001945190.1	predicted: similar to cg3523 cg3523-pa [acyrthosiphon pisum]
C3441172	-1.6	XP_002079151.1	gd23793 [drosophila simulans]
2.0_insect_isotig04574	-1.6	XP_001847529.1	alpha-amylase [culex quinquefasciatus]
SCAFFOLD26091	-1.7	XP_001945100.1	predicted: similar to cytochrome p450 [acyrthosiphon pisum]
BT_Q_ZJU_Singletons4800	-1.7	XP_001945190.1	predicted: similar to cg3523 cg3523-pa [acyrthosiphon pisum]
BT_Q_ZJU_Singletons156390	-1.5	1E3J|	chain a, ketose reductase (sorbitol dehydrogenase) from silverleaf whitefly
2.0_insect_isotig01692	-1.5	XP_001943395.1	predicted: similar to agap003785-pa [acyrthosiphon pisum]
SCAFFOLD21201	-1.5	XP_001605718.1	predicted: similar to ensangp00000019430 [nasonia vitripennis]
2.0_insect_isotig03667	-1.5	XP_001624910.1	predicted protein [nematostella vectensis]
2.0_insect_isotig02522	-1.5	BAH71468.1	acypi001738 [acyrthosiphon pisum]
2.0_insect_isotig01650	-1.4	XP_002069966.1	gk11804 [drosophila willistoni]
BT_Q_ZJU_Singletons25595	-1.4	XP_001943317.1	predicted: similar to ga13362-pa [acyrthosiphon pisum]
2.0_insect_isotig00374	-1.2	XP_001949532.1	predicted: similar to ga21838-pa [acyrthosiphon pisum]
SCAFFOLD42879	-1.3	XP_001951968.1	predicted: similar to serine protease, partial [acyrthosiphon pisum]
2.0_insect_isotig01792	-1.3	XP_001952163.1	predicted: similar to sucrase [acyrthosiphon pisum]
2.0_insect_isotig01786	-1.3	XP_970417.2	predicted: similar to fatty acid synthase [tribolium castaneum]
2.0_insect_isotig01615	-1.3	XP_311149.3	agap000011-pa [anopheles gambiae str. pest]
2.0_insect_isotig01684	-1.3	XP_002422948.1	formate-tetrahydrofolate ligase, putative [pediculus humanus corporis]
C3512360	-1.4	XP_001943317.1	predicted: similar to ga13362-pa [acyrthosiphon pisum]
SCAFFOLD40845	-1.4	Q0ZDF7.1|URAD_AMICA	recname: full=2-oxo-4-hydroxy-4-carboxy-5-ureidoimidazoline decarboxylase; short=ohcu decarboxylase; altname: full=parahox neighbor
C3338630	-1.2	XP_001952163.1	predicted: similar to sucrase [acyrthosiphon pisum]
2.0_insect_isotig00329	-1.2	XP_001951916.1	predicted: similar to peroxinectin [acyrthosiphon pisum]
2.0_insect_isotig06622	-1.2	AAS77768.1	nadh dehydrogenase subunit 3 [bemisia argentifolii]
C3510616	-1.2	XP_001951720.1	predicted: similar to agap002194-pa [acyrthosiphon pisum]
SCAFFOLD12697	-1.1	XP_001122269.1	predicted: similar to dna (cytosine-5-)-methyltransferase 1 [apis mellifera]
2.0_insect_isotig02123	-1.1	XP_001862301.1	l-allo-threonine aldolase [culex quinquefasciatus]
2.0_insect_isotig05513	-1.1	AAK32957.1	cytochrome p450 [anopheles gambiae]
2.0_insect_isotig01831	-1.1	XP_001607772.1	predicted: similar to phosphoribosylaminoimidazole carboxylase [nasonia vitripennis]
2.0_others_isotig07849	-1	XP_393529.3	predicted: similar to ornithine decarboxylase (odc) [apis mellifera]
2.0_insect_isotig04737	-1	XP_001969804.1	gg23742 [drosophila erecta]
BT_Q_ZJU_Singletons30084	-1	XP_001600199.1	predicted: similar to short-chain dehydrogenase [nasonia vitripennis]
2.0_others_isotig11374	-1.1	NP_001098738.1	hypothetical protein loc100125664 [xenopus laevis]
2.0_insect_isotig01749	-1.1	XP_975997.1	predicted: similar to phosphoenolpyruvate carboxykinase isoform 2 [tribolium castaneum]
2.0_insect_isotig05211	-1.1	XP_001946412.1	predicted: similar to agap005175-pa [acyrthosiphon pisum]
FC,fold change (log2 ratio) of gene expression
Homologous function,the function of the homologous gene
