# Supplementary material for: Transcriptomic and Proteomic Responses of Sweetpotato Whitefly, Bemisia tabaci, to Thiamethoxam
Source: PLoS One. 2013 May 9;8(5):e61820. doi: 10.1371/journal.pone.0061820 (PMC3650016; doi:10.1371/journal.pone.0061820)
Supplement: Table S4 — Differentially expressed peptides identified by LC-ESI-MS/MS. (XLSX) [file pone.0061820.s005.xlsx]

## Sheet: Sheet1
		Table S4. Differentially expressed peptides identified by LC-ESI-MS/MS
NO.	Protein ID	Accession no.	Protein description	Organism	Mass	NO.of peptide	NO.of unique peptide	Coverage	Expression level	Sequences
1	2::2.0_others_isotig11193_2|1-171		length=517 numContigs=1		23765	17	15	25.1	1.217	QFSKTWLRDFIVKEENLAYSYYADTIQSDDSLFPNQYYASFFRHFGGFNQRAASFHAFASSASDLYDRVADSFYFAEQYQDKSFEKFSKYSAEEIFKNFNFKADYPKELEAYFQYYFLGSKQYSFINEEIFNQIPRDLESALNKAANGYSFNNTKFYNDFALTIGFPTATG
2	2::2.0_others_isotig04549_5|1-667		length=2033 numContigs=1		94709	16	16	11.8	0.613	PLVLPHSRAHPSLQFKMASLRLIIALLALACGALVDGIPCKLNKKAPLGVCGRAVAAVDVNVNVKTCPDEMIRVYFDEVRVTVTDDYKWIQANMKAIAAQKAAAEYAALVELLAQLEAAKRTFDTDYNVIQTEVYERVTGFQSKYGLLSISYTERVVVVRKSVRMRLYPDLRNFRAIYIKMLPLFNDFYTKYNLERLIRARALPRACEYNFANYLPYSIYVADINVLTSTPWKDYQYVRDLLNKLDFPVGSPEYELKMRLMDQLIDNWIEFNNNRRELEMIYYPKFVDAGDNQKLIDDLYLDYLAKLRGYTYKYGNGFFEVYGQVEDLYLKRKLPFVAYVDFDGISAETDIRSLYLPSTKLSKYYTKIIVTSRMDYLTAKRLWDNLKLNPDSPEWQLRN…
3	2::2.0_others_isotig02361_1|1-233		length=798 numContigs=2		28565	2	2	7.3	0.794	HLCAFTSRENPWNPIRMQTKVLFVLLLACTAAVSADQKVPLQKRADGVISNLLDFTGSLTKNIVDKAVSGGHTSINAISGIINYSLDSAKSLTNTLLRRDLGMTMTMPRYNMPNPNSYSAYDTLGAMLAKAQTDLNNSWDAANTLTRDMRPNLSDRGLAILNMYMRELRTSRASYNNALSNAADLYASLSANPDLNDQDLVNLLQDQYGLEMIDYAQQARRLGNVIKNNGFDL
4	2::2.0_insect_isotig01873_5|7-551	XP_967924.1	glucosyl/glucuronosyl transferases	Tribolium castaneum	74006	4	4	4.6	1.559	KFVSQCRQPVSKLKLLQWILRFISIILTTIASIDCLKILIIYPTPSYSHQRAILALSERLLKDGHKLFVISPNAVPGMESNHNYTYVDLSFSYENFSERKSEDTVNLQTHISKWDLPALMQNFARMAKRQFLSKQFQEFKSRVEAERMKFDLIIVETFFIPWQSVLEPHVGSAPIISMSTVVQDFMGEDAVGSIAHLSYLPSMFSNYRPNMNLFEKIENWVSDYIVRNGYLSALEATARSYFNEVYGPGTEKLVDGCWGQVDLILMATNSMYYYPRALTPNVVEIGPLHLKTPEKLPENLQNWLDGAEKGVIYFSLGSNMKSKSLPIDVRQNFLKFFKQLPPGYRVLWKWELDTKIPGQPENVHSQKWMPQDSVLNHPKVKVFITQGGLQSFQETVHFG…
5	2::2.0_insect_isotig00970_4|1-372	ADK55065.1	luciferin regenerating enzyme	Lampyris turkestanicus	50528	4	4	5.4	1.709	QHTNFYRRFKYSSPAQMNVLVFLFMRVVRVLPVSLHLLRSERLFVLLLLHCIAVKFSPALGIEMSSKVQITPIGPQLDLGEGPHWEAKTKTLYYVDAFAATVHRHVPHTNEHSHCKFKGNTVSFVIPVEGKEESEFVIGLEREIVHVIWDLKSDKPTATRVLSAAEEDRGGNRVNDGKVDPAGRLWTGTLMPGQGLDDAPFTSHLYSFDKGSSPKKHLSGIAVSNGLAWSLDYKTFYYIDSLKYKVQGFDYDITNGTINNERTVFDLKKNNVEGIPDGMTIDSEGKLWVAVYTGGKVIRIDPDTGKLLYILPIPSWEVTSVVFGGPNLDELYVTSANKTKDYPKDKFPQPGQTFKVTNLGVRGTASRSIKLQ
6	2::2.0_insect_isotig02497_6|53-259	ACH90394.1	glutathione-S-transferase	Bemisia tabaci	31552	4	4	10.6	1.844	IITMAPPKLTYFSVKGLGEPVRFILSYANVEFIDDRVNFVEDWPKVKPTTPFGKLPVLEVDGKKVTQASAICRYYAKKCGLVGKDDWEDLLIDATVGTFDDMRQAISTYFYDQNEESKKKKLDLLIKETIPFYMERLEKQIKENGGYLVNGKLTWADLWVVSLLDLVNKYTERTLEEKYPLIIALKEKVLAIPSIKAWVAKRPVTDW
7	2::2.0_others_GG3J73P03FJ7EB_5|1-47		xy=2163_1249 region=3 run=R_2010_05_11_11_44_17_		7332	2	2	27.7	1.251	NQPRTIVGAYIKKLLTSYKDLGPEAKAKVAAISTVMQEQMKQITDIN
8	3::C3418672_1|1-234	XP_001944859.1	MGC82850 protein	Acyrthosiphon pisum	32924	6	4	12.4	1.537	AKFGYDFWYQPYWDTMISSEWGIPNKFKPCFVEEHALDPEIYGRSLNVFSWSKRKLTQIIDLGPEGITPLELRFLHEPTAAEGFVGCGYPGHIFRFFRKDDGSWDAEKVIHIAKKKVIGHAEPEIGGMTLDIVISMDDRFLYTNNWMHGDICQYDITDTRHPKLVGQIFLGGKLLKDGPLKLIDEEQPEPVYVKGRKLDGAPQMMQLSLDGKRLYVSTAVFTPWDKQFYLEHVN
9	2::2.0_insect_contig00018_6|1-254		length=765		31270	13	8	15.7	1.202	QRPQRNNGHNGHNGNNSHNGHNGHNGKNVDSSSSSSSSEENDRYNNGKFASFARHHGSGSSSSSSSSDSSDSSSSSSSSSSSSSSSSSSSSDSSSSDDNSSYGSSVASSEEEHQPFPKLYQAPRTPFLPFFVGYYGNNIQSANNVNSVALARKFAQEIAEDMRSPSDIPAKGTLSKFTLLTRVIRTMDAKQIEQVAREIYFNANKASSYSQEDNKKTYAWKAFRDALVEAGTGPAFVAIVNFIERKEITPYEAS
10	2::2.0_insect_GH93ESX03GA5G4_4|9-151	DAA28627.1	UDP glucuronosyltransferase 2B10-like isoform 1	Bos taurus	20392	2	2	9.8	1.731	VDAKNRGTKYSRMNSIRTTKSNQRWGLFCSIEKYLKNMKRHSAISHDFTARGIDQAVFWIAHVARHGGASHLRPATADTTLFQYFCLDIISVIIVFSLFVLGIVAFIIRSLVSVFLQMKPSKTKNAVNLKCMRENIISLKKID
11	2::2.0_others_isotig03791_4|45-192		length=581 numContigs=2		18751	2	2	6.8	1.371	DHFDQMNYQSWPQSQRTPDMHPILRQNYAPESAQMMAEDSQRSAQTPNHRGQQPGDHKITQEFQGSAKGWNVDVSGKWGPAPHSTGRSAQPDSLPEQPIVSGKSSAQSPTAAVHEPMIQMPKAASPAPTDEKLYSTVEELLRKRLSGV
12	2::2.0_insect_isotig02364_1|1-283	CAO85744.1	glutathione S-transferase	Blattella germanica	40644	2	2	3.2	1.958	ETCDDHFKIQRRDNQIDSSESACQYSFIIRQCRTVSDLRLLSCVRLFGSFTSFFCLSVDLLIQKAHTMTVDIYHIGPSPPCRAVRLAAKLIGVDVNLKVIDITKGEQMTPEFLKLNPQHTVPVMDDNGFILTESRAIMTYLASKYGKDDSLYPKDLQKKAIVDQRLFFDLESLFQPFKNYFWPLVFKVGPHDEKKFQEIPKNLPVLEKILEESEFVAGDSITVADASIVTIISNYDMVGVDFSKYPNISRWYDKCKKVIPDYDEINQKGAEDFKKFWEHLRSL
13	3::C3330076_1|1-650	EFA05836.1	hypothetical protein TcasGA2_TC008620	Tribolium castaneum	83522	32	14	20.6	0.765	LDAVIFLIGIIVANVPEGLLATVTVCLTLTAKRMASKNCLVKNLEAVETLGSTSTICSDKTGTLTQNRMTVAHMWFDNQIIEADTTEDQSGVQYDRTSPGFKALARIATLCNRAEFKPGQEGVSILKKEVNGDASEAALLKCMELALGDVMSIRRRNRKVCEIPFNSTNKYQVSIHETEDANDPRHLMVMKGAPERILDKCSTIFIGGKEKLLDEEMKEAFNNAYLELGGLGERVLGFCDFMLPSDKFPLGFKFDCDDPNFPLSGMRFVGLMSMIDPPRAAVPDAVAKCRSAGIKVIMVTGDHPITAKAIAKSVGIISEGNETVEDIAQRLNIPVSEVNPREAKAAVIHGSELRDLSPELLDEILRYHTEIVFARTSPQQKLIIVEGCQRMGAIVAVTG…
14	2::2.0_insect_isotig02567_5|28-302	XP_625032.1	Proteasome subunit alpha type 1	Apis mellifera	36381	3	3	14.2	1.292	YIMFRNQYDSDVTVWSPQGRLHQVEYAMEAVKLGSATIGLKNKTHAVLIALKRATSELSAHQKKIIPIDDHMGITIAGLTADARMLSRFMRTECLNYKYTHSDLLPVGRLIANVGNKMQVCTQRYDRRPYGVGLLVAGYDDLGPHIYQTCPSSNYFDCKAMAIGARSQSARTYLEKTLNSFPDCSLEELVKHGLRALRDTLPNEVELNTKNVSIAFVGKATPFKILNEEETGTYLTLIEGDERRGAGPSDEPPKDPQPSTTEKKDPVPVVSMETE
15	2::2.0_others_isotig06072_5|200-311		length=935 numContigs=1		14860	2	2	10.7	1.231	PAVTSRPPASTQSVDDVPDRPTTPSPADVVGARHAQGDVNSSTSSKEAKSALDPLIEDIVRGIKGKRNYVDDIFQNARQSQPKNEEKNVSRVEKTQGRTSVLRDDKYGTLAL
16	2::2.0_insect_isotig01921_6|1-484	XP_393051.1	RuvB-like protein 1 isoform 1	Apis mellifera	67180	4	4	3.3	1.347	RGFVCLQFFRLVVFNFVCLNVLKSDQSKMKIEEVKSTVKTQRISSHSHVKGLGLNENGIAIPIAAGLVGQESAREAAGIVVDMIKSKKMAGRAILMAGPPGTGKTAIALAIAQDLGNKVPFCPMVGSEVYSSEIKKTEVLMENFRRAIGLRIKETKEVYEGEVTELTPVETENPMGGYGKTVSHVIIGLKTAKGSKQLKLDPSVHESLQKEKVEVGDVIYIEANSGAVKRQGRSDTFASEFDLEAEEYVPLPKGDVHKKKEVIQDVTLHDLDVANARPQGGQDILSMMGQLMKSKKTEITDKLRKEINKIVNKYIDQGIAELVPGVLFIDEVHMLDIETFTYLHRALESAIAPIVIFATNRGRCTIRGTEDIISPHGIPLDLLDRLLIIRTTPYNRTNM…
17	2::2.0_others_GH93ESX03GBQ8R_3|1-40		xy=2477_0537 region=3 run=R_2010_06_02_10_57_54_		5360	3	2	62.5	1.398	EIYSRRLQVQERLTKQIALAVTKAVEPAGVAVVVEGVHMC
18	2::2.0_insect_contig00243_6|26-472		length=1420		61157	2	2	3.1	2.34	LWINAHRLKKTILNNMELLQGLLSMPSNSTLVCIGISLFVYYYLQDKVNYWAKRGVAYVPASKCLSLFIPQMLQNRTMLEVVSEQYDLLEGHSYGGVYQLTRPTVILRDPAMTKEWLVKGFTSFHDRGPEVEEGQGNLSENLFSLTGDRWHTVRTKLSPAFSSTKLKVMYQTLKGCAEELNAHLQGLCEKRDEAEIDIKDLVGRYAMDAIGACAMGIKCNAIKDPDNCEMKKAVKAIFTINWRFTLMQLCMLIHPKLVKIFGLAGPPKDLTKFLTSVTKQAMDMKTKSGQPRKDFLQIMMSASESETQNGKEHSQNGDQTVKSEDNIFTENVITGVISTFLSAGLDPVAATVTFGLYELAFHPEIQERLFEEIQAARMKSGGEIEYDDIKDMQYLEQVV…
19	2::2.0_others_isotig07091_4|21-258		length=777 numContigs=1		34878	6	6	6.7	1.227	CKSTQSSYPFTMDNQYGIGVNNRYDLFLAGEDDSFDILRSRAATKEPKKKSKVAEKENKPIQPESKSKASTGAREGIKETKNLQNVSKKPDAAKPGPKPKVENAKPKPDSDVKKPKFDSAKPALKSGDSREERNNRRNQEDRPERRSNQSFNRNRDGHDGGDSKPDRFGDRFGESTDRPERPERRERSDRFGDRFGENRGDRFGENRGGDRFGENRGGSRFGESRGERGGRGRGDRPY
20	1::BT_Q_ZJU_Singletons12555_4|1-114		BT_Q_ZJU_Singletons12555_4|1-114		17277	2	2	14	1.28	GLFQNNLIEWITSMTYQAASGAGSKHMIELLNQMRILGNIVKKNNNAKSILEIDSKITKFMGKLPIKNFGAPIAGSLMPWIDKKMDNGQSKEEWKGNVETNKILGCSPNTIKID
21	2::2.0_insect_GH93ESX01B5901_6|67-162	XP_001371286.1	hypothetical protein	Monodelphis domestica	12919	8	8	29.2	1.235	LERTLFKSLYSLSSTQDPVEDSTRIGRAGTVRRQAVDVSPLRRVNQAIWLLCTGAREAAFRNIKTIAECLADELINAAKGSSNSYAIKKKDELERV
22	2::2.0_insect_isotig04070_2|32-176	EFN79238.1	Thioredoxin, mitochondrial	Harpegnathos saltator	20591	2	2	11	1.292	IPFIMSLRVFSRLNSLLKVQETLLIGGRRLESSNSFKIQDVKDFEERVKSSKKPVIVDFFATWCNPCRTLTPRLESVIEERKGEVLLAKVDIDENTDLAMDYEVGAVPVLLVMREGKVLERLVGLQDTDKLRKFIDQAIEAPVPK
23	2::2.0_insect_GH93ESX01AP06W_4|1-137		xy=0179_1526 region=1 run=R_2010_06_02_10_57_54_		19828	5	5	13.1	1.259	YYQNKKYARNEDRFLLQQQQLLSSSSDSSSSSSSSSSPSMESYEQRNQNGPSIHKLYRSMNEGDKTCFSVNSIPTCRYPYKPQGGANKEIDFYCVPRNSEEAQYFEKLMKKGVNPSQLSSKKANNQFKVNIPEYCVA
24	2::2.0_insect_isotig03357_3|24-205		length=796 numContigs=1		23700	2	2	11	0.797	SHPSEIHIFKYLINMASLAGFVRSSRPLFSKLSQCRSRSLAIPKFAPIPPNRFISKSTSNKDGDVPVLDEPILAPPSHILKQPITPTKDWVTHGFSDEDEIEDLNEYHHAMFCSYSVVLVGIIMCWVYYPDYQELDWTQREAYIQIREREKAGLPYVDPNYVDPATIPLPSDEELEGVEIII
25	2::2.0_insect_isotig02586_1|1-339	XP_001606152.1	serpin	Nasonia vitripennis	50762	3	3	6.2	1.216	DENSVICVPSAQILLGLLYAGAGGQTASELESLFGVDNKQLETLANFQKFTSHLEVPEIKIANTAYVAKDLELKKEFVEKGQKYFNVTVSQLDFTKKAEAAKTINSWVESKTEKLIKDLIKADDLSDDAKLVLLNAIYFKGKWAHPFKHHDTRDADFYLTKDKTIKVKQMAQTSRFQYAEDADYKYLIMPYKGSKLSMLIILPKDHETFEKKDISKANLSSLKFEEFRVQVQLPKFKIESTIDWIDILKEKIPTAFDGRANLQGISDTKLLVSKMIQKAFIKVDEEGTEAAAATAMAVEFFSMPIPEPPPKPFHVDRPFYYSVRAETASGSIDLFQGVA
26	3::SCAFFOLD22307_1|1-264		Similar to AGAP010885-PA	Tribolium castaneum	34714	2	2	3.8	1.234	IYIQSTLSSQSVEEVGAAAPPKTTKWLQLFIFHDKEITKSLVARAEKAGFKAIVVTVDIPIISLRKYGSSSSGPPFPDHLRFANLTNEKCSLSQTNKNSGGERFDTKGAFNPRQTWDDIKWLKSITKLPVVLKGILTKEDAILGADAGADGILVSNHGGRQLDGSPATIEALPEIVEAVGDKVEVYLDGGVRGGADVFIALALGAKMVFIGRPAVWGLAVGGQDGVKKVLDIFKYELSNVMALSGAVSPQQITNSMVVHESYYN
27	2::2.0_insect_isotig01452_1|1-128	AAV90733.1	mitochondrial ATP synthase coupling factor 6 precursor	Aedes albopictus	19119	4	4	9.4	1.486	FLVVFVISCVLSEHSFLFGFACISQIFRMLAQPILKTVSKELSSAGRRNIGISAVLLQKASDPIQQLFLDKLKEYKSKSGGKLYDPSPEIQKEYKAELARIAQQYGGVKPEEMTKFPKFTFQDPEIKT
28	2::2.0_insect_isotig01894_1|1-483	XP_971475.1	transport protein sec23	Tribolium castaneum	62162	3	3	3.5	1.296	GGRIMLFVGGPCSEGPGQVVNDELKDPIRSHHDIQKDNAKYMKKAIKHYEGLAVRAASNGHAIDIYSCALDQTGLLEMKQCCNSTGGHMVMGDSFNSSLFKQTFQKVLAKDVKGDYKMAFNGIVEVKTSQELKVMGAIGSCVSLNVKSAHVSDTEVGLGGTSQWKFCTLYPSTTCAFYFEVVNQHTAPIPQGGRGCIQFITQYQHSSGQKRIRVTTLARNWADMNSGLMHISAGFDQEAAAVIMARTVVNKAETDEGPDVMRWADRMLIRLCQKFGQYSKDDPNSFRLPENFSLFPQFIYHLRRSQFLQVFNNSPDETSFYRHILLREDLTQSLIMIQPILYSYSLAGPPEPVLLDTSSIQPDRILLMDTFFQILIFHGETIAQWRALRYQDMPEYEHF…
29	2::2.0_insect_isotig00202_6|1-671		length=2577 numContigs=7		82544	5	4	4.8	1.226	FTMRSWFISLCLCTSVALAAHHLGRDATDGGDNNGGMVPADKNFLQRQLQILRLMRNIHEQNHDQEQQQIGNNFNIDQEASNFSNSQAVKAMQQQIAQGKTSRNQVFDIMSNHQRQEAITLFDLFFFAKDFDTFYRAACWARDRVNAGQFIYALHVAVMHRPDTQGMVLPPIYEVHPQLFVDSMAMQKLYNARMQGQDNFQVQANYSNCPTHCQFNNCENTPNSPNCQNCQNCDLINGNGNNNNNNNDDNNNGNNNNGNSGSNFNSNNNPNNQVSYFNEDPGMNAFNYYFHVQYPFWMDQKKYGINKARQGELFLHQNQQLLARYNLERYSNNLDAIQPLQVQQNGAVCIQEGHNPSISFENGNNMPNRPDNFCIDQNNNNNNNQNGQNNNNNNFNNGE…
30	2::2.0_insect_isotig04126_6|22-220	XP_392246.2	quaking related 54B CG4816-PB, isoform B	Apis mellifera	28732	4	4	5	1.202	GMQQSDNMENENSEQEQQVDMAKQSLYIKELLKEKMQLDPEHHANAMRLVDEEVQKAQTLKTPKENRYVDIYREKPIRVAVKVLVPVKEHPRFNFVGKLLGPKGNSLKRLQEETMCKMAILGRGSMRDKAKEEELRQALDPKYAHLADELHVEIVALAAPAEAHARIAFALAELSKYLVPDLNDEIHQEQMREIQQYGP
31	2::2.0_insect_isotig00775_3|13-274	NP_001164444.1	peroxiredoxin-like protein	Apis mellifera	32938	7	7	19.8	1.341	SATTSVGSRERSAVSAVPPASRVQFPFPVSCVLCPVSCACDMRLEAIIPDFPANTTHGPINFYDFAGDSWVVLFSHPADFTPVCTTELGRMAVHLPEFEKRNVKLLALSCDKLETHTDWVNDIKSYCRDIPGEFPYPIISDESRELAVKLDMLNEADRENPDTAMTVRALYVISPDKRLRLSMVYPTSTGRNVDELLRVIDSLQLHDRLKVIATPANWVPGDKVMILPSVTDEQIQELFPEGAVDSVSMPSGKCYVRTTTKY
32	2::2.0_insect_isotig00867_5|26-560		length=1801 numContigs=2		71909	7	5	6.4	0.638	PISDKNIVGKSIGLTTSTWNFNQMRWSLICTILLIFYTQNIKAAKILVLATVSSHSHAIFTNAITSALAARGHELVVLSPDKEKRAIRNITTIYLEGGYDDELFNINLEEMPSSEGLFDYFGMYKEFSTATCQTLLFSPGNKKFHRDHRDHKFDLILFDIGCSECFLKYAHVFGHPPIVAYSAFFTIQPYNLGNFYNPAYVPHFATGFGDRMKFNERFMNWLYYQYNSFWRRYLYLPAVDRISDAFFGFSEPKIADLEREISLMLTDDHFSISLPRPNVPAVVDVAGLHIKPAKALPDDLKEFVEGAKHGVIFFSLGSNFLSKHMSQQRKQLFLEAFSHLPQRVVWKYEDETLQNLPKNVLVKKWCPQTDILGHNNTVLFMTHNGYLSTQESIYFGVPM…
33	3::C3312738_1|1-300	XP_001947489.1	CG7470 CG7470-PA	Acyrthosiphon pisum	38895	13	13	17.3	1.275	GRRLASLGRRMSKAPLRYLTVVPTSARHFTTNLSLSTPHAGHGIDLKRALQAADRRRSKFTDRSQLKYSRRIVVKLGSAVITREDEHGLALGRLASIVEQVAELQQEGRECIMVTSGAVAFGKQKLTQELLMSLSMRETLSTTDTTRQDVKTFLEPRAAAAVGQSGLMSLYDAMFAQYGVKIAQVLVTKPDFYNEETRKNLFTTLSELLSLNILPIINTNDAVTPPPAPEAPSGKKVIALKDNDSLAAMLAAEIQSDLLILMSDVDGIYTLPPWQEGSKMIWTYTSDMHDVVQFGKKSKV
34	2::2.0_insect_GG3J73P03F802L_6|1-99	XP_001846737.1	mitochondrial ATP synthase F chain	Culex quinquefasciatus	13141	3	3	10.1	1.332	ITLKWVLETILSNMIEKSMDLTIRLATMENRIRTSVKVKLGELGAWFGRRNKSPSAVVGALSVAYWRWNRRFNHCRIGNAAYPLQVIIGGAIIGYLINY
35	2::2.0_insect_isotig00714_1|31-167	NP_524709.1	ribosomal protein S15Aa, isoform D	Drosophila melanogaster	19640	3	3	15.3	1.263	SLKKSVTMVRMSVLADALKCINNAEKRGKRQVLIRPCSKVIIKFLTVMMRHGYIGEFEIVDDHRAGKVVVNLTGRINKCGVISPRFDMPVNKFENWTNSLLPSRQFGYLVLTTSGGIMDHEEARRKHLGGKILGFFF
36	2::2.0_insect_isotig04753_4|1-158	EFN68959.1	Mitochondrial import inner membrane translocase subunit TIM44	Camponotus floridanus	21408	2	2	8.2	0.532	ELSETLTEICKLDPNFDKNEFLLLCEKEIIPNILESMIRGDLDILKDWCHEAPFNALATPIRQAKTAGYIFCSKVIDIDNVDLAMGKVMEQGPVLVISFQTQQIMCLRDRSNKVIEGDPEKILRVNYVWVLCRDRSELNPRAAWRLLDLSANSAELLV
37	2::2.0_insect_isotig01042_1|27-291	EFN68394.1	14-3-3 protein epsilon	Camponotus floridanus	36338	12	3	12.8	0.796	SECGIKLSDMSEREDNVYKAKLAEQAERYDEMVEAMKKVASLDVELTVEERNLLSVAYKNVIGARRASWRIISSIEQKEENKGAEEKLEMIRQYRAQVEKELRDICSDILGVLDKHLIPCASSGESKVFYYKMKGDYHRYLAEFATGNDRKEAAENSLVAYKAASDIAMVELPPTHPIRLGLALNFSVFYYEILNSPDRACRLAKAAFDDAIAELDTLAEDSYKDSTLIMQLLRDNLTLWTSDMQGDGETEQKEQVQDVEDLDAS
38	2::2.0_insect_isotig02102_1|64-258	XP_002432273.1	GTP-binding protein 128up	Pediculus humanus corporis	27761	2	2	7.2	0.799	EIMATILEKIAAIEAEMARTQKNKATSGHLGLLKAKLAKLRRELITPKGGGGGPGEGFDVAKTGDARIGFVGFPSVGKSTLLSNLAGVYSEVAAYEFTTLTTVPGCIKYKGAKIQLLDLPGIIEGAKDGKGRGRQVIAVARTCSLIFIVLDVLKPLGHKKILEHELEGFGLRLNKQPPNIVFRKKTKEELTFNAW
39	3::C3509528_1|1-324	NP_001040293.1	glycyl-tRNA synthetase	Bombyx mori	44070	2	2	7.1	1.377	MARIQLYLLQVGIDKKRLRFRQHMSNEMAHYACDCWDAECLTSYGWVECVGCADRSAYDLTQHTRATNVKLAAEKKLPEPKTITVTEAQANKAVIGKQFKKDAKLITDALASLGETEAQELKAELEKVGECTVRADGREFKLTPEMVSINTLSKTVHVEEVVPNVIEPAFGIGRIMYALLEHSFRIREDDEQRTYFSLPPLVAPLKCCVLPLSNNTDFKPLIRQLSTELSKQNVSHKIDDSSGSIGRRYARTDEVAIPFSVTIDFDSLNTPHTATLRHRDTTLQLRLPVSDIPLAICDLASQRRSWEDLEKVYPKFEQQEASKA
40	2::2.0_bacteria_GG3J73P03F2HQU_2|1-38		xy=2371_2500 region=3 run=R_2010_05_11_11_44_17_		5376	2	2	26.3	1.32	HFSAIKCDGFKTLTEGQAVEFEVVSSDKGPTAANVFCL
41	2::2.0_insect_isotig02070_1|55-404	EFN75465.1	Cathepsin L	Harpegnathos saltator	46707	3	3	8.9	1.268	FHLTRPVVQARMQPTIILLAALLPAILAVTSNDVVHEEFEQFKMAHGKKYNNDIEEGFRLKIFMENKHKIAKHNQRHERGEVSYKLAMNHFGDMLHHEFKNVMNGYKQSLLLQLGADAKKDASSFLAPANVVLPRAVDWRTAGAVTPVKNQGHCGSCWSFSTTGALEGQHFRKTGRLVSLSEQNLIDCSTRYGNQGCNGGLMDQAFQYIKDNQGIDTEISYPYEEHDDKCRYKPRQKGATDKGFTDIESGSESDLKAAVATVGPISVAIDASAEDFQFYSEGVYYSDQCNSTQLDHGVLVVGYGTTEDDEDYWIVKNSWGPKWGAKGYILMARNRDNNCGIATAASYPLV
42	2::2.0_insect_GG3J73P03F4J6L_3|1-163	NP_001037478.1	p270	Bombyx mori	21652	2	2	8.6	0.765	NIAYHSRYIANAGPKLLKYLQQVIPSPKARSEKWISTSLPESQWNSSLAKLSSAEYHTNNLLRPVLFEEACRLIPHRAILIEIAPHGLLQAILKRSLSKDILSVSLTQRDHKDNAHVLFNSLGKLFEAGLTPKLSVLYPPVALPVSRGTPMIAPLVRWEHSED
43	2::2.0_insect_isotig00269_2|53-698	EFN75172.1	Paramyosin, short form	Harpegnathos saltator	91439	28	6	23.8	0.797	FREEAGQRSSRKDRMGQKKIEIEEKWHHPPTSIYEDNYGYLANYYQPMLDYMDARDRGAPRGEYPHLPWTNERGRDQYRPSNKIQKYPTAELNALAVEAERAAQRNLKHVPVGIKSSDFAKIKTVQASRLSEHIRLASVDKEIKDSLARRSLRTRANSESRMADYELSVPLSSLARKPQILHNVSKIKSIASIKNQFLFETNRNLNKDNVDIKVGDYWGRQGYYADEAIKYHGTVQDKRLGFTSQNYVTDDVKYVRPIQSLQRELTGFENKATHLFDENSKQTSIEIEQLNARVVEAETKLKTEVTRIKKKLQATITDLELSLDVANKNNLELQKVVKKQSLQLTELQAHYDEIQRQLAVTLDQLAVSTRKNQSLTAELEEIRGNYDNALRSKRHAEQL…
44	2::2.0_others_GG3J73P03HE431_2|1-35		xy=2925_3087 region=3 run=R_2010_05_11_11_44_17_		4442	3	2	91.4	1.293	LIFGTNPSAQTLQRMAQFTNEDQDQQVNAAVKSAL
45	2::2.0_insect_isotig00439_2|22-603		length=1835 numContigs=4		77080	28	17	19.2	0.536	IIFQEKENPIASTSWVTLERERDSVKMEISFWAKLALIFSFGVLNCCALEVSIPNGKIIGFDTLRTRDGRVIHSFTGIPFAKSPVGPLRFKEPQPAEPWKEPLDATNNATMCAQFDFGNLSNPNLLGQEDCLVLHVYSPKVDKSARLPVMVWIHGGAFQYGAAFIYGPDLLLDKDVVLVTINYRLGALGFLSTGDEVIPANLGLKDQALAIKWVHDNIEYFGGNPDLVTLFGESAGAGSAHLNLLSPLNKGLIHRVISMSGSGYCPSAIIPPQLLKDRTKALAVLCSCPPEPSHELRKCMQTVPVELLVQMADRFQDWVVSDLNFAPTIESETKNAFLPKELDQLGSKIPFMTGITSGEGGFFASIINRVGLGNELKENPQRVLPSALLLKSRFPRDKL…
46	2::2.0_insect_isotig03818_1|1-237		length=714 numContigs=1		32374	2	2	7.2	1.291	KDLPWLISFTSGEGLYPVGEYAENERNALTELDENWLEIAPHLLDFAHTVPQDDHKEYSAEIRLQYFGNRSVSPETFENLIQVVGDRLYMVGIQQAVRFQAAANKSPVYLLHFASPIEKSLSTKFCSSTKNYGVSHADDLGYILQASWGQPWKSKEEWAKSRLLINVWLSFAKTGVPSVGSTEWLPVSRNIKRTGDIDYVKINSYKDVESMKNPASTSTNFGLHLLIPRTKRSKNKS
47	3::SCAFFOLD10141_1|1-188	XP_001951185.1	Similar to phosphatidylethanolamine-binding protein isoform 2	Acyrthosiphon pisum	27541	3	3	12.2	0.758	RAEMNSKVEHFEICPDVIDKKSNLTFIHVQFRQTVTVMLGNKVHVKALGCKPHNITWEADNSTLHTLLLVDPDWPIKKPRTINEFPHWMVGNIPGSNVEKGETIIDYVGYRATIIDENPHRYTFLVYAQPSRESIKFDEPRLNNTQIYERERFANFSGKNIAKKYNLKNVAINFFLVSHKKKYVNDDY
48	2::2.0_insect_isotig02867_2|17-299	XP_002432900.1	eukaryotic translation initiation factor 3 subunit	Pediculus humanus corporis	37333	3	3	9.2	1.227	FLIMALNVSVKVHPVVLFQIVDAYERRNVDANRVIGTLLGIVDKGVVEVTNSFCLPHIEDSEKVLAELRYAADMLSMLTKINKQEKIVGWWATGHEVTIHSNIIHEYYSLECQDPVHLTLDTTLQDGHMGMKAYMNVPVGVPKRKVGSMFTRIPVEVTCYQPEIVGIRLSQKTASSFKRSPELTIEPASDLGQVGEACSKMNKLIDKILAYVEDVLTEKVPANDTVGRALLNMVHSVPQMTPEQFEDMFNSSIKDLLMVITLAQLTRTQLQLNEKLTLLSALN
49	2::2.0_insect_isotig01705_3|80-649		length=2230 numContigs=1		77688	5	5	5.3	0.73	PRYKTQSFPPTKQSTVRYTMAPKSEVQGMNQQSLIEPLVVVKDMKNSKYYLDPLSLLGERSFKEPQEIPDDVTGTPIQEFFRGATVFLTGGTGFMGKVLIEKLLRSCPHVKHIYLLIRPKKGRAIHERLDDIFSDRLFKRLKHEVPKYYHKVSVISGDCSLPGLGISQQDRDLITDEVDIIFHGAATVRFNEPLRQALAINVEGSRAILQLAKQVKNLKSIVHVSTAFANCPNLEIDEKFYSVPNTYEEVLEKVNKCTDEEIEETLSEFLGPWPNSYTYTKALAEHVVRDESKGLPIAIFRPAVVITTYREPVRGWIDNLYGPVGLIVGAGTGVLHTYHATPELVTDMVPVDLTVNSLIATAWQTGKIAKEQKSLSIYNYVSSAQNPIVWSDFIRLNHK…
50	2::2.0_insect_isotig01840_6|476-565		length=1698 numContigs=1		12260	2	2	12.2	1.264	YCLRIGTFYGNPEETPQDKAMTRLMLNMWLTFAKTGKPVVSHNVQWSPVKPEGDVDYLEINSSEDLVPKTSSDLGYRRFWDSLPFNEPVE
51	3::SCAFFOLD39072_1|1-312	XP_002430164.1	sodium/potassium-transporting ATPase subunit beta-2	Pediculus humanus corporis	43118	7	7	7.4	0.737	LKEQYYTPPPKVSNWESFKTFLWNSETNQFLGRTAGSWAKIILFYVVFYLVLAAFFSVLMFLFFQTIDYNKPKWQLDRSLIGTNPGLGFRPTPPDTHIDSTLIWYKRQASNYALWVQKLDDFLQDYREPSFLPGGGQNIIQCSDGNKPPPGKVCAVNIHQLNPCIKETGYNYDKGSPCIFLKLNKIYGWEPAYYNDTKNLPAKMPADLKNFIIQEKNREPYKKLETVWVSCEGENPADIENIGPISYLPSRGFPGYYFPYINTEGYLSPVIAVWFESPARGVLINIECKAWAQNIHHDRHERRGSVHFELMI
52	2::2.0_others_isotig12398_2|16-128		length=478 numContigs=1		14818	3	3	8.8	1.287	FCVEMNALVLLLVRTCNKNVTLINLLAKTDFQEGASGLVDVLTLTDTLEHEVVRHDKIEASIHHLKKYLTSVIGLIEWLQQRGMAHLEELRSEYNDIRRELGTLTNLTCDNVA
