# Supplementary material for: Transcriptomic and Proteomic Responses of Sweetpotato Whitefly, Bemisia tabaci, to Thiamethoxam
Source: PLoS One. 2013 May 9;8(5):e61820. doi: 10.1371/journal.pone.0061820 (PMC3650016; doi:10.1371/journal.pone.0061820)
Supplement: Table S7 — Differentially expressed peptides within drug metabolism pathway in response to thiamethoxam exposure. (XLSX) [file pone.0061820.s008.xlsx]

## Sheet: Sheet1
Table S7: Differentially expressed peptides within drug metabolism pathway in response to thiamethoxam exposure. Up-regulated peptides by 1.2-fold are in red, while down-regulated peptides by 0.8-fold are in green.
E C no.	Peptide ID	KO ID	FC	Accession no.	Homologous function
CYP3A4	2::2.0_insect_contig00243_6|26-472	K07424	1.2		UDP glucuronosyltransferase 2B10-like isoform 1 [Bos taurus]
2.4.1.17	2::2.0_insect_GH93ESX03GA5G4_4|9-151	K00699	0.8	DAA28627.1	PREDICTED: similar to glucosyl/glucuronosyl transferases [Tribolium castaneum]
2.4.1.17	2::2.0_insect_isotig01873_5|7-551	K00699	0.6	XP_967924.1	PREDICTED: similar to glucosyl/glucuronosyl transferases [Tribolium castaneum]
2.4.1.17	2::2.0_insect_isotig00867_5|26-560	K00699	-0.6		glutathione S-transferase [Blattella germanica]
2.5.1.18	2::2.0_insect_isotig02364_1|1-283	K00799	1	CAO85744.1	glutathione-S-transferase [Bemisia tabaci] >gi|199584543|gb|ACH90396.1| glutathione-S-transferase [Bemisia tabaci]
2.5.1.18	2::2.0_insect_isotig02497_6|53-259	K00799	0.9	ACH90394.1	glutathione-S-transferase [Bemisia tabaci] >gi|199584543|gb|ACH90396.1| glutathione-S-transferase [Bemisia tabaci]
FC,fold change of protein expression
Homologous function,the function of the homologous protein
