# Supplementary material for: Transcriptomic and Proteomic Responses of Sweetpotato Whitefly, Bemisia tabaci, to Thiamethoxam
Source: PLoS One. 2013 May 9;8(5):e61820. doi: 10.1371/journal.pone.0061820 (PMC3650016; doi:10.1371/journal.pone.0061820)
Supplement: Table S10 — Primers used for qRT-PCR analyses. (XLSX) [file pone.0061820.s011.xlsx]

## Sheet: Sheet1
Table S10 Primers used for the qRT-PCR analyses.
		q RT-PCR Primers		qPCR primer
Gene name	Description	F	R
2.0_insect_isotig04790	cathepsin B-like proteinase [Diabrotica virgifera virgifera]	AGGTTCGGCAATGGGTGCGA	GAAGCGTCTGGCAGTGGGGG
2.0_insect_GH93ESX01B4IEJ	predicted: similar to cg3523 cg3523-pa [acyrthosiphon pisum]	CTGAGCCTCTGGGGCCTCGT	GGCCGTCGCTAAGGCCAGAC
SCAFFOLD12300	agap001657-pa [anopheles gambiae str. pest]	ACGAGGATCCTGGCATGAACGC	ACGGGCCAGGAGTTGTTGGT
SCAFFOLD12578	PREDICTED: similar to Proteasome 2 subunit CG3329-PA [Apis mellifera]	ATACCCGAGCAACCGCAGGC	AGCAGCAGTACCCGCTCCACA
2.0_insect_isotig01167	hypothetical protein loc100168734 [acyrthosiphon pisum]	CGGGCTGAGCTTGGCCGAAA	TTGCAGCCGGCCAACGTGAA
2.0_insect_isotig01768	hypothetical protein aael_aael013802 [aedes aegypti]	GCCGTCGAGACGTGCACCAA	GCCCGGCGTCGATCTTCGAG
SCAFFOLD41990	cathepsin B-10270 [Acyrthosiphon pisum]	ACCGTCCTCCGACTTCGCACT	GGCCCCAACCGATCATCCGC
2.0_insect_isotig02356	acypi005632 [acyrthosiphon pisum]	GAGTCCCTTCTGGCCGCACG	ATCGCCTTCCGCCCGTCTCT
2.0_insect_isotig04644	PREDICTED: similar to cytochrome P450 CYP6AY1 protein [Acyrthosiphon pisum]	CGCGGCGAAGCTGAAGGGAA	CGCAGTTGAGCCCGAAGGCA
SCAFFOLD30128	cathepsin B-348 [Acyrthosiphon pisum]	TTCATGGGCTGTGGCAGCGG	TCCCGGCCAACCACCATTGC
SCAFFOLD30690	PREDICTED: similar to antennal-enriched UDP-glycosyltransferase [Tribolium castaneum]	TGGAATCAGCGGCCAGGAGC	TGTGCAGCGGTCCAACCTCG
2.0_insect_GH93ESX03GA5G4	PREDICTED: UDP glucuronosyltransferase 2B10 [Bos taurus]	GGTATCAGCAGTTGCCGGCCT	GCGCTGGGGGCTGTTCTGTT
2.0_insect_GH93ESX01BBYEK	glutathione-S-transferase [Bemisia tabaci]	ACCATTTGGGAAGCTGCCCGTT	AGGTTCCCACTGTGGCGTCG
2.0_insect_isotig02497	glutathione-S-transferase [Bemisia tabaci]	AGGTTCCCACTGTGGCGTCG	CTCGGCGAGCCGGTTCGTTT
SCAFFOLD18671	PREDICTED: similar to glucosyl/glucuronosyl transferases [Tribolium castaneum]	TCGTCGAAGGGTGCTGGGGA	CTCCTCGCTCTGCCCCGTCT
2.0_insect_isotig02032	PREDICTED: similar to AGAP007029-PA [Acyrthosiphon pisum]	GGCAAGCCCAGGGTGGGAAC	ACCTTGGTTGCCGCAGGTGG
SCAFFOLD30058	glutathione-S-transferase [Bemisia tabaci]	GATTGACGCGACCGTGGGCA	CCGCCCAAGTCAACCTTCCGT
2.0_insect_isotig02612	hypothetical protein TcasGA2_TC030780 [Tribolium castaneum]	CCGGTCGGTGTAGGGGCTGA	ACCCGTCATCTCGCTGGCCT
BT_Q_ZJU_Singletons16804	PREDICTED: similar to glucosyl/glucuronosyl transferases [Tribolium castaneum]	GCACGCCTACCGTTGGCACT	CCAGCAGGGCGTCTTGGCTC
2.0_insect_isotig00683	PREDICTED: similar to AGAP010399-PA [Acyrthosiphon pisum]	CCTGGCAACTTGGGCGGAACT	GACCCGGTCCCACCTGTGTT
2.0_insect_isotig01866	AGAP005752-PA [Anopheles gambiae str. PEST]	AGGTCCCCGATGCTGGGCTT	CCATTTCCAGAGCGCGGCCA
2.0_insect_isotig02841	cytochrome P450 CYP6CX1v2 [Bemisia tabaci]	GTGGCCCGCACGATCTGCTT	AGCTCTCGCCGGCATTCAGC
2.0_others_isotig06556	uridine diphosphate glucosyltransferase [Bombyx mori]	CAAGAGTCGCGTGGAGGCGG	AGAGGTGCGCGATGGACCCT
SCAFFOLD33197	hypothetical protein TcasGA2_TC012061 [Tribolium castaneum]	TATGGCCCGGATGGGGAGGC	TGGGAGTGATGGGCCTCGGG
gi|113017755|gb|EE602200.1|EE602200	cytochrome p450 cyp6cx1v2 [bemisia tabaci]	ATCAGTGGCGTGGCGTGCAT	AGCCGTTTCCAAGTCGGGCA
2.0_insect_isotig00408	glutathione-S-transferase [Bemisia tabaci]	TCGCTGGAATGGCCTGCACT	GGGAGGTTGACCTGGGCGGA
C3418672	MGC82850 protein	GTCATCGGTCACGCAGA	ATCCTTCAACAATTTACCACCT
2.0_insect_isotig00970	luciferin-regenerating enzyme	ATGGGGCATCGTCCAGCCCT	AACGCGGGTTCTGTCTGCCG
2.0_insect_isotig01873	PREDICTED: similar to glucosyl/glucuronosyl transferases [Tribolium castaneum]	AGAGGTGCGCGATGGACCCT	CAAGAGTCGCGTGGAGGCGG
2.0_insect_isotig00710	cytochrome c oxidase subunit vib cox12 [glossina morsitans morsitans]	ACAGCCCCATTTGACCCCCG	TGCGATTCCCACTTTTCGACCCA
2.0_insect_isotig00440	COE2 [Bemisia tabaci]	ACACTCGAGCGTGAACGCGA	ATGGCTCAGCTGGTTGCGGC
2.0_insect_isotig05513	cytochrome P450 [Anopheles gambiae]	GCGTCACGCCCACTATCGCA	GACCCCCAGATCCCGCCAGT
C3490411	predicted: similar to abc transporter [acyrthosiphon pisum]	AGGAAGGGCTCCGCGGTGAA	GGCGGTCAACTCGCCAGACC
2.0_insect_isotig02573	glutathione S-transferase 3 [Choristoneura fumiferana]	CAGGGTGTCGCACTTGCCGT	CTGGCCGCCAAACTCCTCGG
SCAFFOLD26091	PREDICTED: similar to cytochrome P450 [Acyrthosiphon pisum]	CGCCATGTGTGCCCACCTTT	TCGCCTCCTCTTGCTGCTCA
2.0_insect_isotig00866	GA13878 [Drosophila pseudoobscura pseudoobscura]	GGTGTCCGAAGACGTGGGCG	ATGCCATCGTCGGAGGGGCT
2.0_others_isotig11193	vitellogenin [Athalia rosae]	GGCTCCGCGACTTCATCGTCA	CGTGGAAGGAAGCAGCGCGT
2.0_insect_contig00018	vitellogenin [Lethocerus deyrollei]	GCGGGTCCAGTTCCGGCTTC	ATGCGCAGCCCAAGCGACAT
BT_Q_ZJU_Singletons157950	heat shock protein 70 [Bemisia tabaci]	TCTGGATGCAAACGGAATCTTA	TCTTCCTCCTTGTACTGCTCA
C3421652	pyruvate carboxylase, mitochondrial [culex quinquefasciatus]	TGATGTCCTGAGCAAGGCCGA	GAGCGTAGGGGCTCCGGGAA
2.0_insect_isotig06379	predicted: similar to 1-acyl-sn-glycerol-3-phosphate acyltransferase [nasonia vitripennis]	GTGGCGATTGCCTCGCAACT	TGACGTGGCTTGTTCCTGAGCC
